# Supplementary material for: Kinetics of spontaneous phase transitions from wüstite to magnetite in superparamagnetic core–shell nanocubes of iron oxides
Source: Royal Society of Chemistry journal article supplement (doi:10.1039/d3nr06254f), 2024-01-01
Supplement: d3nr06254f1.pdf [file d3nr06254f1.pdf]

## Supplementary information

### Kinetics of spontaneous phase transitions from wüstite to magnetite in superparamagnetic core-shell nanocubes of iron oxides

Tereza Sojková,<sup>a,b</sup> Roman Gröger,<sup>a</sup> Jakub Poloprudský,<sup>a</sup> Ivo Kuběna,<sup>a</sup> Oldřich Schneeweiss,<sup>a</sup> Martin Sojka,<sup>a</sup> Zuzana Šiška,<sup>a,b</sup> Jakub Pongrácz,<sup>a,b</sup> and Naděžda Pizúrová<sup>a</sup>

<sup>a</sup>Institute of Physics of Materials and CEITEC IPM, Czech Academy of Sciences, Žižkova 22, 616 00 Brno, Czech Republic

<sup>b</sup>Central European Institute of Technology (CEITEC), Brno University of Technology, Purkyňova 123, 612 00 Brno, Czech Republic

### Structural characterization

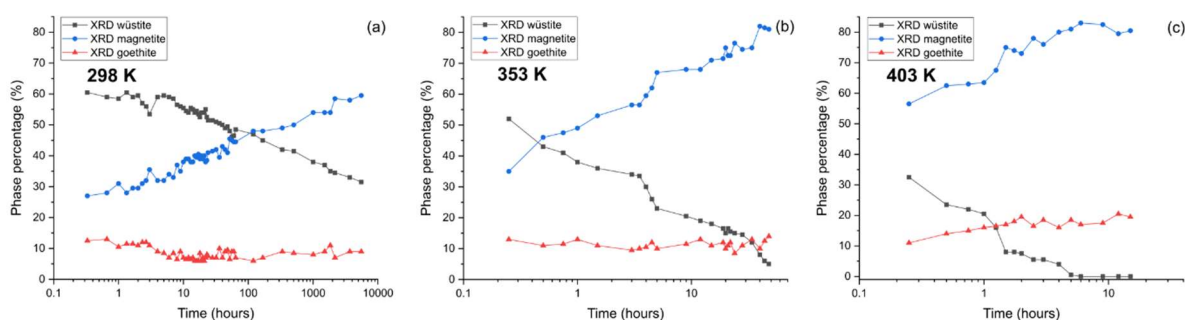

**Figure S1.** The percentage of wüstite (black), magnetite (blue), and goethite (red) calculated by Rietveld refinement from time-resolved XRD data for (a) 298 K, (b) 353 K, and (c) 403 K. The lines are added to lead the eye.

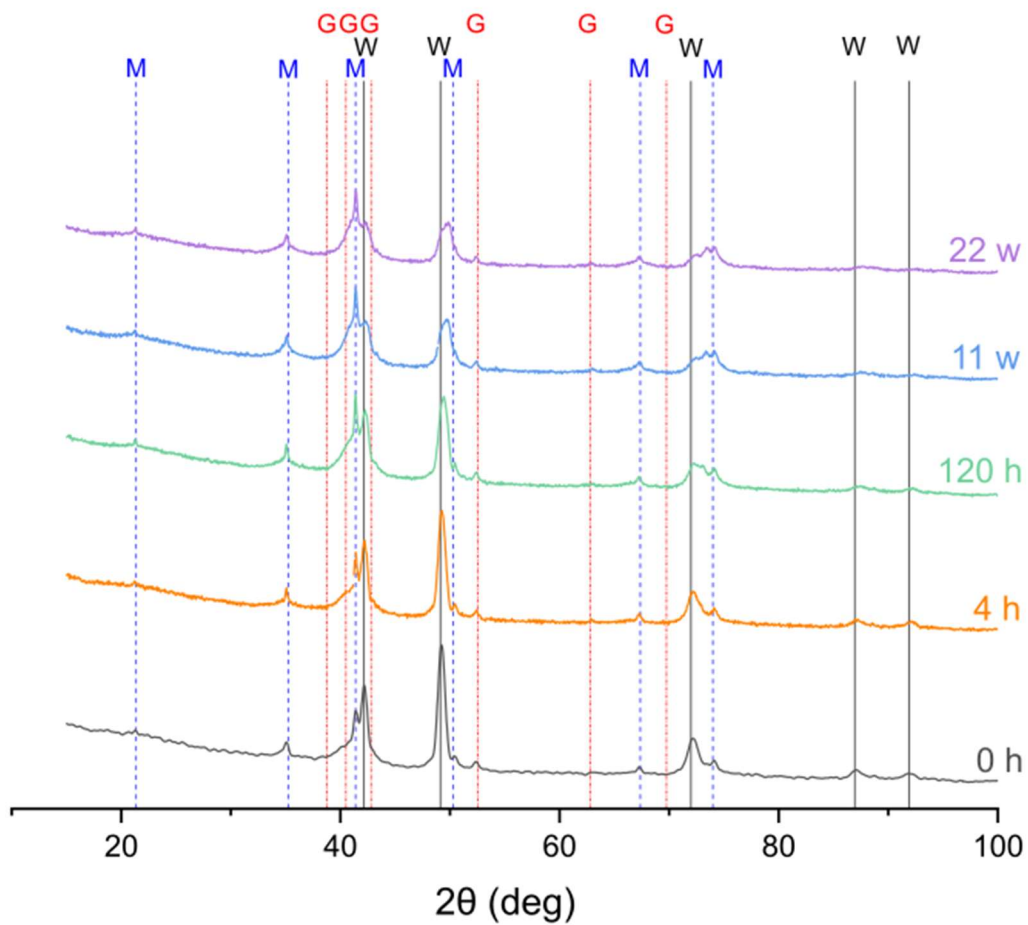

**Figure S2.** XRD diffractograms of samples after synthesis in several time (0 hours, 4 hours, 120 hours, 11 weeks, and 22 weeks) at 298 K. The characteristic diffractions of wüstite (FeO) are depicted by vertical solid black lines, magnetite (Fe<sub>3</sub>O<sub>4</sub>) diffractions are depicted by vertical dotted blue lines, and goethite (FeOOH) diffractions are depicted by vertical dash-dotted red lines.

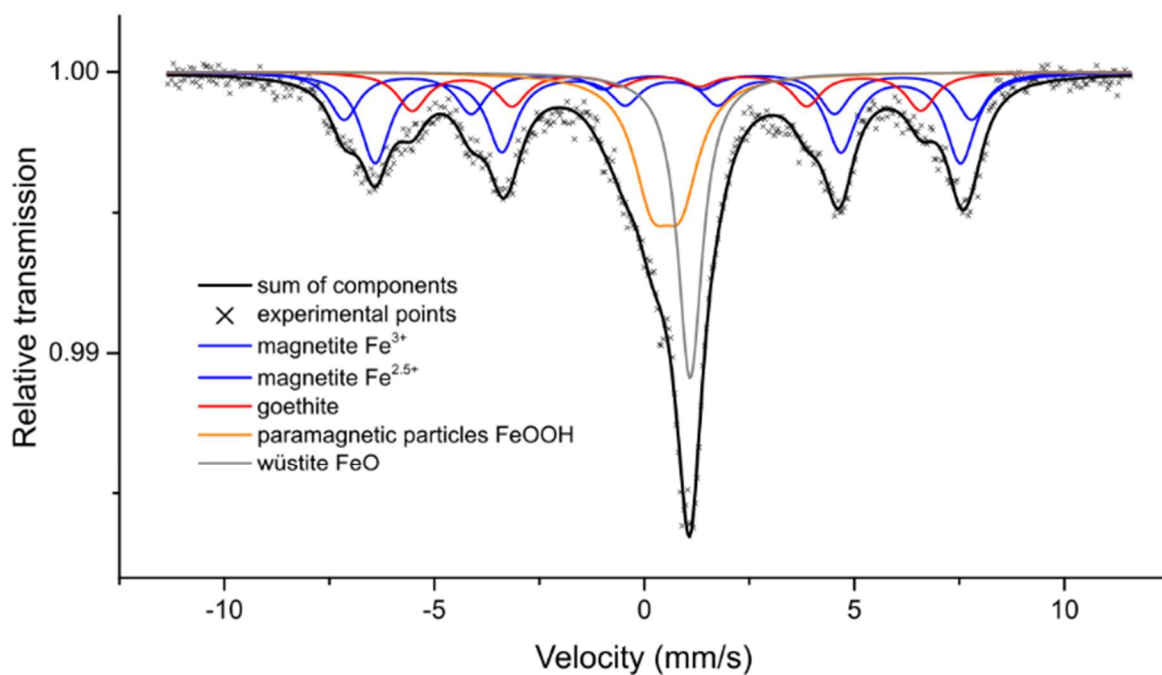

**Figure S3.** The Mössbauer spectra of the 23 nm core-shell sample measured at 293 K we published previously in collaboration. [19]

**Table S1.** The relative contents of fitted phases by MS and their hyperfine parameters.

| Phase fitted                 | Content<br>( <i>Fe</i><br>atomic<br>fraction) | Sextet                    |                               |                               | Doublet                   |                               | Singlet                   |
|------------------------------|-----------------------------------------------|---------------------------|-------------------------------|-------------------------------|---------------------------|-------------------------------|---------------------------|
|                              |                                               | Isomer<br>shift<br>(mm/s) | Quadrupole<br>Shift<br>(mm/s) | Hyperfine<br>induction<br>(T) | Isomer<br>shift<br>(mm/s) | Quadrupole<br>Shift<br>(mm/s) | Isomer<br>shift<br>(mm/s) |
| Magnetite Fe <sup>3+</sup>   | 0.16                                          | 0.27                      | 0.27                          | 46.5                          |                           |                               |                           |
| Magnetite Fe <sup>2.5+</sup> | 0.30                                          | 0.61                      | 0.09                          | 43.3                          |                           |                               |                           |
| Wüstite                      | 0.20                                          |                           |                               |                               |                           |                               | 1.10                      |
| Goethite                     | 0.13                                          | 0.46                      | 0.17                          | 37.7                          |                           |                               |                           |
| Paramag.<br>FeOOH            | 0.21                                          |                           |                               |                               | 0.54                      | 0.68                          |                           |

## Theoretical description of transition kinetics

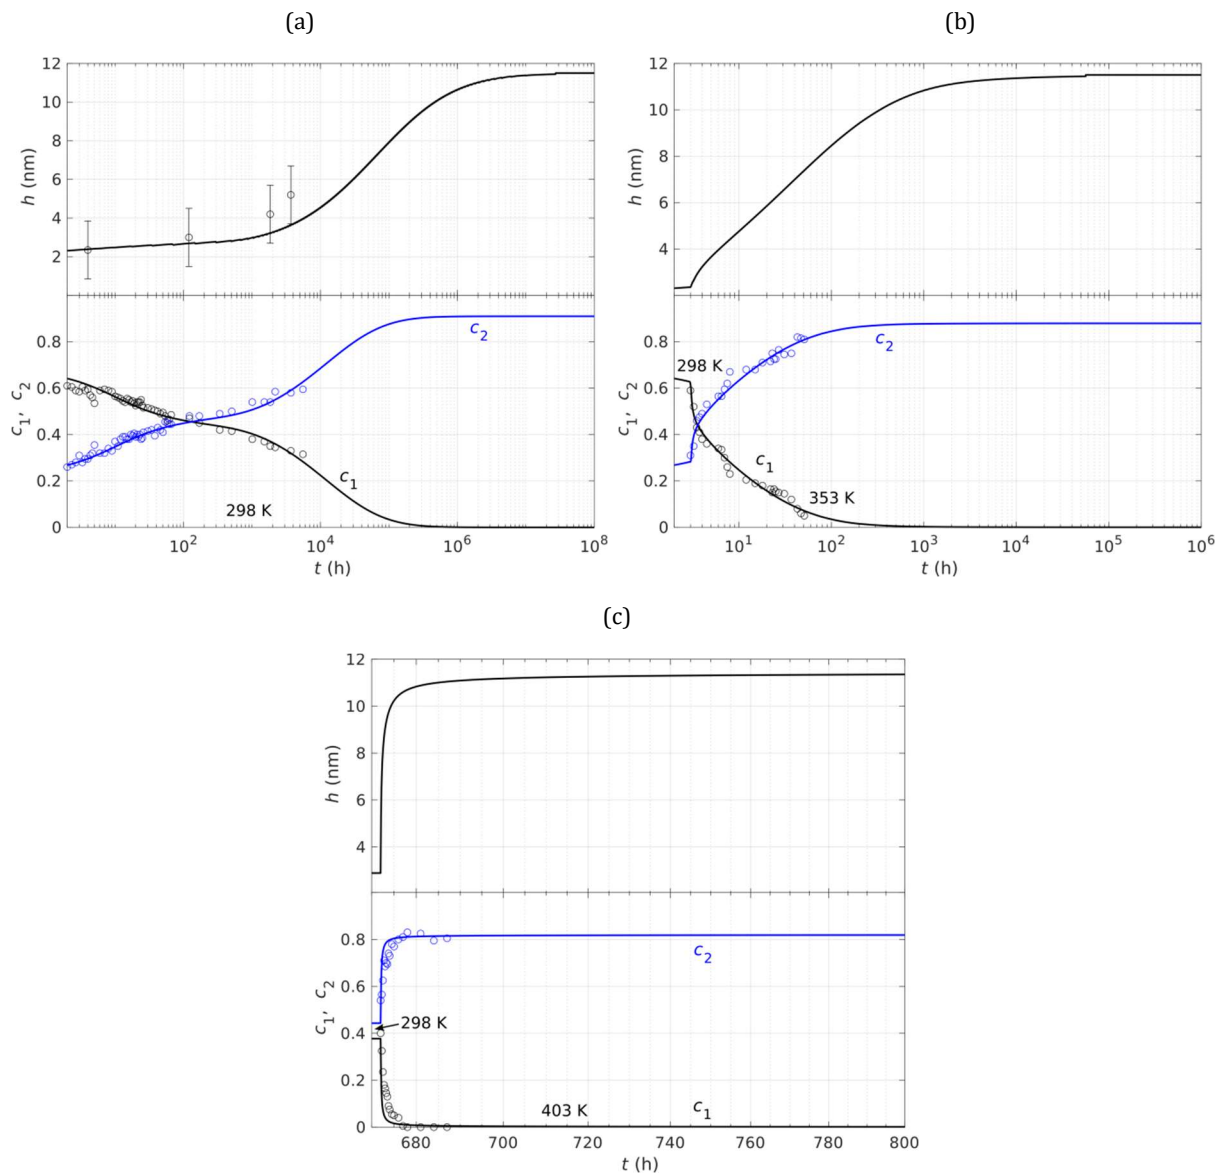

**Figure S4.** Long-term predictions of the position of the phase boundary ( $h$ ) and the concentrations of wüstite ( $c_1$ ) and magnetite ( $c_2$ ) for NPs held at the temperature of (a) 298 K, (b) 353 K, and (c) 403 K.
